# Supplementary material for: A theoretical study of formaldehyde adsorption and decomposition on a WC (0001) surface
Source: Royal Society of Chemistry journal article supplement (doi:10.1039/c8ra04983a), 2018-01-01
Supplement: c8ra04983a1.pdf [file c8ra04983a1.pdf]

## A theoretical study of formaldehyde adsorption and decomposition on WC(0001) surface

Dandan Wang,<sup>1,2</sup> Yingying Fan,<sup>1</sup> Zhonghui Sun,<sup>1</sup> Dongxue Han,<sup>\* 1,3</sup> Li Niu,<sup>1,3</sup>

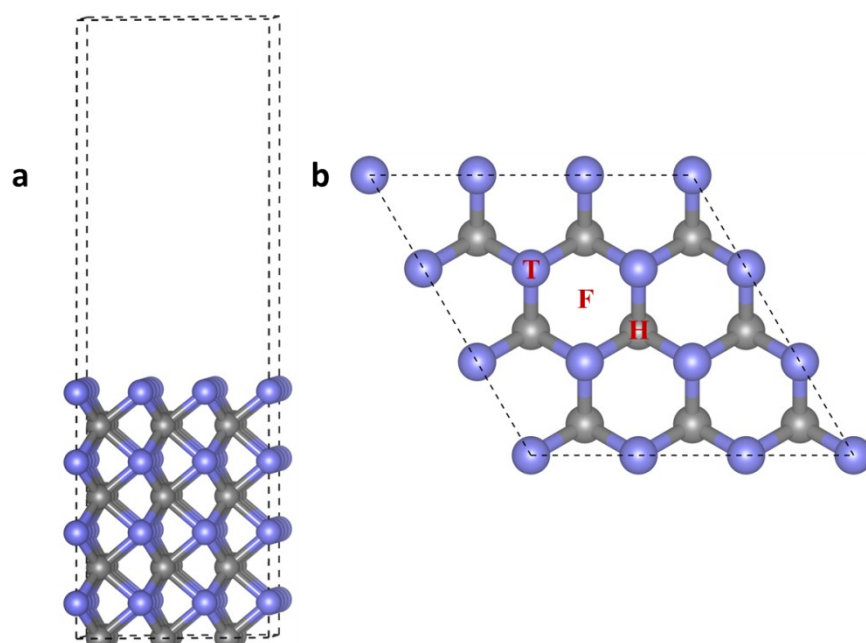

**Figure S1** Optimized structure of clean WC (0001) surface: (a) side view, and (b) top view. Gray and blue balls represent C and W atoms, respectively. To analyze the adsorption, three sites with high symmetry were considered: top site (T), fcc site (H), and hcp site (H).

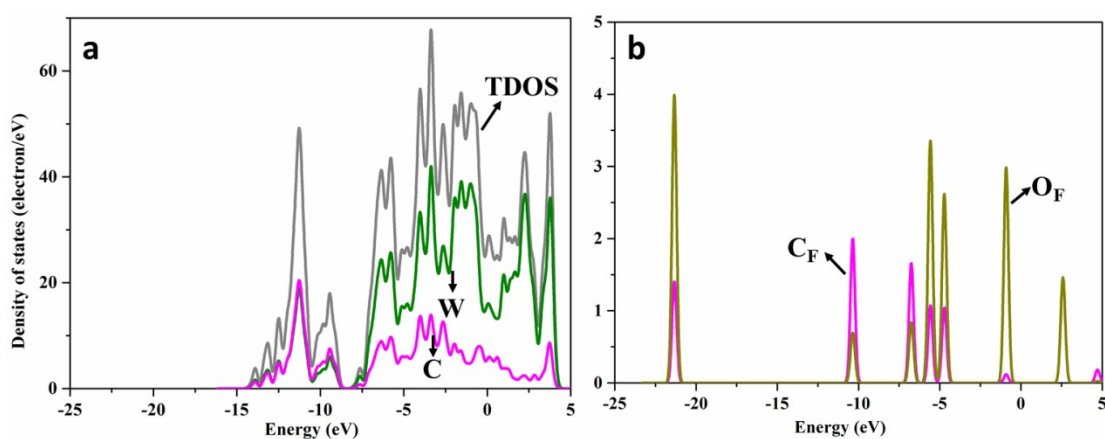

**Figure S2** (a) DOS and PDOS of clean WC (0001) surface; (b) PDOS of HCHO molecule. The gray curves present TDOS for WC (0001) surface. PDOS of C, W and O atoms are denoted by pink, olive and dark yellow curves, respectively. The Fermi level of clean WC (0001) surface is assigned at 0 eV.

**Table S1** The calculated adsorption energies at the most stable sites of various species produced in the process of HCHO decomposition.

| <b>Surface species</b>        | <b>Adsorption energy (eV)</b> |
|-------------------------------|-------------------------------|
| O                             | 5.06                          |
| CO                            | 1.17                          |
| CHO                           | 3.88                          |
| CH <sub>2</sub>               | 5.97                          |
| CH <sub>3</sub>               | 3.52                          |
| C <sub>2</sub> H <sub>4</sub> | 1.55                          |
| CH <sub>4</sub>               | 0.01                          |
